# Supplementary material
Source: ML conference proceedings conference paper supplement (https://openreview.net/forum?id=g2dXxjD9Ucv)
Supplement: supplementary_material [file attachment]

## 498 A Normalizing flows

499 Normalizing flows (Papamakarios et al., 2021) represent a general framework for density estimation  
 500 of a multi-dimensional distribution with arbitrary dependencies. Briefly, suppose  $X \sim \mathcal{P}_X$  is a  
 501 random variable in  $\mathbb{R}^d$ . Now, let  $Z \sim \mathcal{N}(0, I_d)$  be a multivariate standard normal distribution. We  
 502 assume there exists a mapping  $G$  that is triangular, increasing, and differentiable such that

$$G(X) = Z.$$

503 A formal treatment of when such a  $G$  exists can be found in Bogachev et al. (2005). However,  
 504 a sufficient condition is that the density of  $X$  is greater than 0 on  $\mathbb{R}^d$  and the cumulative density  
 505 function of  $X_j$ , conditional on the previous components  $X_{\leq j}$ , is differentiable with respect to  
 506  $X_j, X_{\leq j}$  (Papamakarios et al., 2021):

$$U_i = G_i(X) \equiv F_i(X_i | X_{\leq i})$$

507 From this construction, each  $U_i$  is independent of all previous  $U_i$  and has distribution  $\text{Unif}[0, 1]$ .  
 508 From there, we simply set  $Z_i = \Phi^{-1}(U_i)$ , where  $\Phi$  is the CDF of the standard normal.

509 Since  $G_i(X)$  depends only on the elements in  $X$  up to  $i$ , it is triangular. Because  $p_X > 0$ , the  
 510 conditional cdfs are strictly increasing, so  $G$  is an increasing map. Finally, since each cdf is  
 511 differentiable, the entire map  $G$  is differentiable, and its Jacobian is non-zero.

512 Because of the inverse mapping theorem,  $G$  is invertible and we can write

$$X = G(Z).$$

513 Normalizing flows are a collection of distributions that parameterize a family of invertible, differen-  
 514 tiable transformations  $G_\theta$  from a fixed base distribution  $Z$  to an unknown distribution  $X$ . Using the  
 515 change-of-variables theorem, we can express the distribution of  $X$  in terms of the base distribution  
 516 density  $p_Z$  and the transformation  $G_\theta$ :

$$p_\theta(X) = p(G_\theta(X)) \left| \det \left( \frac{\partial G_\theta(X)}{\partial X} \right) \right|$$

517 where  $\frac{\partial G_\theta(X)}{\partial X}$  is the Jacobian of  $G$ . The goal is to find a parameter value  $\hat{\theta}$  that maximizes the  
 518 likelihood of the observed  $X$ :

$$\hat{\theta} = \arg \max_{\theta} p_\theta(X).$$

519 A key feature of normalizing flows is that they are composable.

### 520 A.1 Flow Architecture

521 In experiments, the first layer  $G$  is a Gaussianization flow (Meng et al., 2020) applied elementwise:

$$G_j(X_j) = \Phi^{-1} \left( \sum_{m=1}^M \sigma \left( \frac{X_j - \mu_{j,m}}{s_{j,m}} \right) \right),$$

522 where  $\Phi^{-1}$  is the standard normal inverse CDF. With sufficiently large  $M$ , this Gaussianization  
 523 layer can approximate any univariate distribution. This is composed with a Masked Autoregressive  
 524 Flow (MAF)  $F$  (Papamakarios et al., 2017), which consists of MADE layers interspersed with batch  
 525 normalization and reverse permutation layers:

$$\text{MADE}_{j,k} = (X_j - \mu_{j,k}) \exp(-\alpha_{j,k})$$

$$\text{where } \mu_j = f_{\mu_j,k}(X_{<j})$$

$$\alpha_j = f_{\alpha_j,k}(X_{<j})$$

$$F = \text{MADE}_{j,K} \circ \text{BatchNorm} \circ \text{Reverse} \circ \text{MADE}_{j,K-1} \circ \dots \circ \text{BatchNorm} \circ \text{Reverse} \circ \text{MADE}_{j,1}$$

526 Here,  $f_{\mu_j}$  and  $f_{\alpha_j}$  are fully connected neural networks.

## B Proof of convergence

**Theorem 1.** Let  $X \in \mathbb{R}_{N \times D}$  be a random feature matrix, where each row  $X_{i,\cdot}$  is independent and identically distributed;  $x \in \mathbb{R}_{N \times D}$  be the observed feature matrix; and  $\alpha_j$  be the p-value as defined in Equation (4) with test statistic  $T_j(X)$ . Suppose there exists a sequence of functions  $(G^n)_{n=1}^\infty$  and a base random variable  $Z$  satisfying the following conditions:

1. Each  $G^n$  is continuously differentiable and invertible.
2.  $G^n \rightarrow G$  pointwise for some map  $G$  that is triangular, increasing, continuously differentiable, and satisfies  $G(X_{i,\cdot}) \stackrel{D}{=} Z$ .

For  $n = 1, 2, \dots$ , let  $X^n$  be the random feature matrix where each row  $i$  is independent and has distribution  $X_{i,\cdot}^n = (G^n)^{-1}(Z)$ . Then, the p-value in Equation (5) calculated using  $K$  MCMC samples targeting  $X_{\cdot,j}^n \mid X_{\cdot,-j}^n = x_{\cdot,-j}$  converges to the correct p-value  $\alpha_j$  with probability 1.

The assumption that  $G^n \rightarrow G$  depends on the universality of the family of normalizing flows chosen. Universality has been shown for a wide variety of normalizing flows (Huang et al., 2018; Meng et al., 2020; Kobzyev et al., 2020).

*Proof of Theorem 1.* Without loss of generality, we consider the first feature, which is indexed by  $j = 1$ . Let  $p_X$  be the density of each row of the matrix  $X_{i,\cdot}$  and  $p_Z$  the density of the base variable  $Z$ . For each i.i.d observation at  $i = 1, \dots, N$ , we define  $F$  to be the cumulative distribution function of  $X_{i,1}$  conditional on the other features  $X_{i,-1} = x_{i,-1}$ :

$$\begin{aligned} F(x_1) &\triangleq \mathcal{P}(X_{i,1} \leq x_1 \mid X_{i,-1} = x_{i,-1}) = \frac{\int_{-\infty}^{x_1} p_X(x'_1, x_{i,-1}) dx'_1}{\int_{-\infty}^{\infty} p_X(x'_1, x_{i,-1}) dx'_1} \\ &= \frac{\int_{-\infty}^{x_1} p_Z(G(x'_1, x_{i,-1})) |\partial G(x'_1, x_{i,-1})| dx'_1}{\int_{-\infty}^{\infty} p_Z(G(x'_1, x_{i,-1})) |\partial G(x'_1, x_{i,-1})| dx'_1}. \end{aligned} \quad (7)$$

For a particular mapping  $G^n$ , we define  $F^n$  analogously:

$$F^n(x_1) \triangleq \frac{\int_{-\infty}^{x_1} p_Z(G^n(x'_1, x_{i,-1})) |\partial G^n(x'_1, x_{i,-1})| dx'_1}{\int_{-\infty}^{\infty} p_Z(G^n(x'_1, x_{i,-1})) |\partial G^n(x'_1, x_{i,-1})| dx'_1}. \quad (8)$$

Since  $G^n$  and  $G$  are continuously differentiable,

$$p_Z(G^n(x'_1, x_{i,-1})) |\partial G^n(x'_1, x_{i,-1})| \rightarrow p_Z(G(x'_1, x_{i,-1})) |\partial G(x'_1, x_{i,-1})| \text{ as } n \rightarrow \infty. \quad (9)$$

Then, by the dominated convergence theorem,  $F^n \rightarrow F$  pointwise.

Let  $X_{i,1}^n \sim F^n$ . Since  $F^n \rightarrow F$  pointwise, and  $F$  is a distribution function,  $X_{i,1}^n$  converges in distribution to  $X_{i,1} \mid X_{i,-1} = x_{i,-1}$ . Likewise, the joint distribution across all independent observations, written  $X_{\cdot,1}^n$ , converges in distribution to  $X_{\cdot,1} \mid X_{\cdot,-1} = x_{\cdot,-1}$ .

Now, let  $\tilde{X}_{\cdot,1}^n$  be equal in distribution to  $X_{\cdot,1}^n$ , but sampled such that it is independent of the outcome  $Y$ . It follows from the reasoning above that  $\tilde{X}_{\cdot,1}^n$  converges to the desired null distribution  $\tilde{X}_{\cdot,1} \mid X_{\cdot,-1}$  as  $n \rightarrow \infty$ . Define  $g_1(\tilde{x}_{\cdot,1}) \triangleq 1[T_1(X) < T_1([\tilde{x}_{\cdot,1}, X_{\cdot,-1}])]$ . With the regularity condition that  $T_1$  is discontinuous on a set of measure zero, the expectation converges:

$$\lim_{n \rightarrow \infty} \mathbb{E}_{\tilde{X}_{\cdot,1}^n}(g_1) \rightarrow \mathbb{E}_{\tilde{X}_{\cdot,1} \mid X_{\cdot,-1} = x_{\cdot,-1}}(g_1) = \alpha_1. \quad (10)$$

The Cesaro average of  $g$  calculated over MCMC samples that target the distribution of  $\tilde{X}_{\cdot,1}^n$  under the probability law of  $G_n$  converges almost surely to  $\mathbb{E}_{\tilde{X}_{\cdot,1}^n}(g_1)$  (Smith & Roberts, 1993). That is,

$$\lim_{K \rightarrow \infty} \hat{\alpha}_{j,K,n} = \lim_{K \rightarrow \infty} \frac{1}{K} \sum_{k=1}^K g_1(\tilde{X}_{\cdot,1,k}) = \mathbb{E}_{\tilde{X}_{\cdot,1}^n}(g_1) \text{ w.p.1.} \quad (11)$$

Combining Equation (10) and Equation (11) gives the desired result.  $\square$

## 558 C Feature datasets

|     | Name             | Covariate | Response  | $N$     | $D$   | # Relevant | Source               |
|-----|------------------|-----------|-----------|---------|-------|------------|----------------------|
| 559 | Gaussian Mixture | Synthetic | Synthetic | 100,000 | 100   | 20         | -                    |
|     | scRNA-seq        | Real      | Synthetic | 100,000 | 100   | 10         | 10x Genomics (2017)  |
|     | Soybean          | Real      | Real      | 5,128   | 4,236 | -          | Xavier et al. (2019) |

560 **Licensing** All of the data used is available for personal use. Terms for the scRNA-seq data can be  
561 found here: <https://www.10xgenomics.com/terms-of-use>. The scRNA-seq data was accessed  
562 using scvi-tools (Gayoso et al., 2021), distributed under the BSD 3-Clause license. The soybean data  
563 is part of the SoyNAM R package (Xavier et al., 2019), distributed under the GPL-3 license.

## 564 D Architecture and training details for synthetic experiments

### 565 D.1 FlowSelect

566 For FLOWSELECT, the joint distribution was fitted with a GaussMAF normalizing flow as described  
567 in Appendix A. The first Gaussianization layer consisted of  $M = 6$  clusters, followed by 5 layers of  
568 MAF. Within each MAF layer, the neural network consisted of three masked fully connected residual  
569 layers with 100 hidden units, followed by a BatchNorm layer.

570 We trained the Gaussianization layer first with 100 epochs and learning rate  $1 \times 10^{-3}$  within the  
571 ADAM optimizer. This allowed the Gaussianization layer to learn the marginal distribution of each  
572 feature. Then, we jointly trained the whole architecture with 100 epochs and learning rate  $1 \times 10^{-3}$   
573 using ADAM.

574 **MCMC** We draw 1000 samples using a Metropolis-Hastings procedure. The proposal distribution  
575 is a random walk:

$$X_{i,j,k}^* \sim \mathcal{N}(\tilde{X}_{i,j,k-1}, \hat{\sigma}_j^2),$$

576 where  $\hat{\sigma}_j^2$  is the sample conditional variance:

$$\hat{\sigma}_j^2 = \hat{\Sigma}_{j,j} - \hat{\Sigma}_{j,-j} \hat{\Sigma}_{-j,-j}^{-1} \hat{\Sigma}_{-j,-j}^T$$

where  $\hat{\Sigma}_j = \widehat{\text{Var}}(X)$

### 577 D.2 Variable selection methods

578 **Linear** For the linear response, we estimate a linear model with an L1 penalty (aka the LASSO) on  
579 training data:

$$\hat{\beta} = \arg \min_{\beta} \frac{1}{N} \|X\beta - Y\|_2^2 + \lambda \sum_{j=1}^D |\beta_j| \quad (12)$$

580 The penalization term  $\lambda$  is selected via 5-fold cross-validation.

581 **Nonlinear** For the nonlinear response, we fit a random forest on the training data. The hyperparam-  
582 eters are the defaults in the scikit-learn implementation.

583 **Feature statistic** If  $\hat{f}(X)$  is the fitted regression function, then the feature statistic is the negative  
584 mean-squared error:

$$T(X, Y) = -\frac{1}{N} \|\hat{f}(X) - Y\|_2^2.$$

### 585 D.3 Competing methods

586 For DDLK (Sudarshan et al., 2020), KnockoffGAN (Jordon et al., 2019), and DeepKnockoffs,  
587 (Romano et al., 2020), we used the exact architecture and hyperparameter settings from their respective  
588 papers. For the ablation study in Section 5.3, we use the exact implementation in Tansey et al. (2021).  
589 For these methods, we used the code that the researchers graciously made publicly available:

|     | Method                                                                                                  | Link                                                                                                                                  |
|-----|---------------------------------------------------------------------------------------------------------|---------------------------------------------------------------------------------------------------------------------------------------|
|     | DDLK                                                                                                    | <a href="https://github.com/rajesh-lab/ddlk/">https://github.com/rajesh-lab/ddlk/</a>                                                 |
| 590 | DeepKnockoffs                                                                                           | <a href="https://github.com/mnesia/deepknockoffs/">https://github.com/mnesia/deepknockoffs/</a>                                       |
|     | HRT (MDN)                                                                                               | <a href="https://github.com/tansey/hrt/">https://github.com/tansey/hrt/</a>                                                           |
|     | KnockoffGAN                                                                                             | <a href="https://github.com/firmai/tsgan/tree/master/alg/knockoffgan">https://github.com/firmai/tsgan/tree/master/alg/knockoffgan</a> |
| 591 | For MASS (Gimenez et al., 2019), we followed their described procedure and fit a mixture of             |                                                                                                                                       |
| 592 | Gaussians to the feature distribution using scikit-learn, selecting the number of components via the    |                                                                                                                                       |
| 593 | Akiake Information Criterion (AIC). We then used the knockoffs R package, available on CRAN,            |                                                                                                                                       |
| 594 | to sample knockoffs using the estimated parameters for each component.                                  |                                                                                                                                       |
| 595 | For RANK (Fan et al., 2020), we estimate the sparse precision matrix using the Graphical LASSO          |                                                                                                                                       |
| 596 | (Friedman et al., 2008) implemented in sci-kit learn, using cross-validation to tune the regularization |                                                                                                                                       |
| 597 | parameter. We then use the knockoffs R package to sample the knockoffs with this covariance.            |                                                                                                                                       |

## 598 E Architecture and training details for soybean GWAS

599 **Discrete flows** For the discrete flows in the soybean example, we use a single layer of MADE  
600 which outputs a dimension of size 4.  $\mu$  is then set equal to the argmax of this output.

601 For training the flows, we use a relaxation of argmax with temperature equal to 0.1.

602 **Discrete MCMC** Each feature has  $K = 4$  values, so we can enumerate all four possible states  
603 for each proposal and sample in proportional to these probabilities via a Gibbs Sampling procedure.  
604 Setting the probabilities leads to an acceptance rate of 1, and the samples are uncorrelated since the  
605 previous sample doesn't enter into the proposal distribution

606 **Predictive model** For the predictive model of each trait conditional on the SNPs, we use a fully  
607 connected neural network. This network has three hidden layers of size 128, 256, and 128. ReLU  
608 activations are used between each fully connected layer. Dropout is used on both the input layer and  
609 after each hidden layer with  $p = 0.2$ . The learning rate in ADAM was set to  $1 \times 10^{-5}$ , with early  
610 stopping implemented using a held-out validation set.

611 The feature statistic for each sample is the negative mean-squared error (MSE) for each observation.

612 **Runtime** To obtain sufficient resolution on roughly 4200 simultaneous tests, we drew 100,000  
613 samples from our model. The runtime was 10 hours using a single NVIDIA 2080 Ti.

614 **Selected SNPs** Table 1 shows the SNPs selected by FLOWSELECT that are associated with oil  
content in soybeans.

| Chromosome | SNP           | p-value  |
|------------|---------------|----------|
| 4          | Gm04_42203141 | 1.60e-04 |
| 5          | Gm05_37467797 | 1.90e-04 |
| 8          | Gm08_15975626 | 2.10e-04 |
| 14         | Gm14_1753922  | 9.00e-05 |
| 14         | Gm14_1799390  | 1.60e-04 |
| 14         | Gm14_1821662  | 2.90e-04 |
| 18         | Gm18_1685024  | 5.00e-05 |

Table 1: Selected SNPs for soybean GWAS experiment.

615

## 616 F Runtime comparison of each controlled feature selection method

| Method       | Runtime (min) |
|--------------|---------------|
| DeepKnockoff | 3.0           |
| KnockoffGAN  | 3.73          |
| MASS         | 12.6          |
| DDLK         | 91.9          |
| FLOWSELECT   | 59.4          |

Table 2: The median runtime for each method on the scRNA-seq data with  $D = 100$  features and  $N = 100,000$  observations. All experiments were implemented using PyTorch, except for KnockoffGAN, which was implemented in Tensorflow, and MASS, which we implemented using scikit-learn and the knockoffs R package. The experiments were conducted using an Intel Xeon Gold 6130 CPU and an NVIDIA GeForce RTX 2080 Ti GPU.

## 617 G Comparison to Holdout Randomization Test of Tansey et al. (2021)

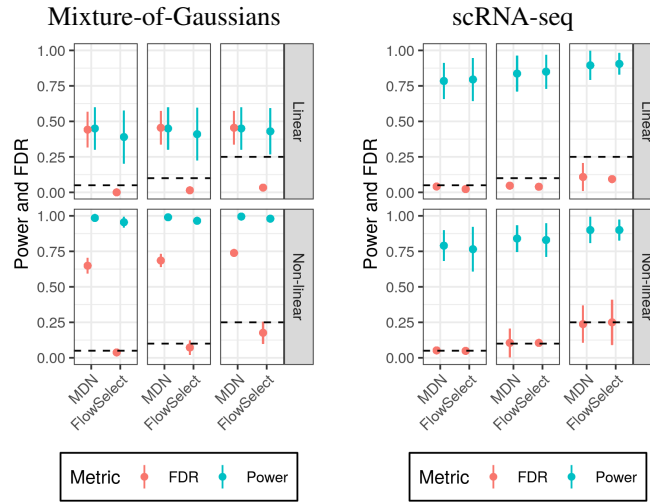

Figure 4: Comparison of FLOWSELECT to the HRT procedure in Tansey et al. (2021) which samples the complete conditionals using multiple mixture-density-networks (MDNs). Each column shows the power and observed false discovery rate (FDR) at targeted FDRs of 0.05, 0.1, and 0.25 (indicated by the dashed lines). The experimental settings for each dataset are the same as in Figure 2.

## 618 H Oracle Model-X

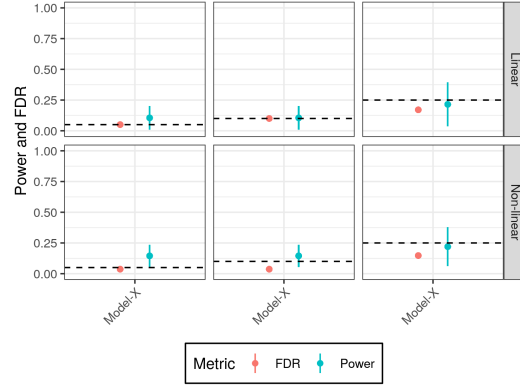

Figure 5: FDR control and power of Oracle Model-X knockoffs on the mixture-of-Gaussians dataset (compare to Figure 2).

## 619 I DDLK with true joint distribution

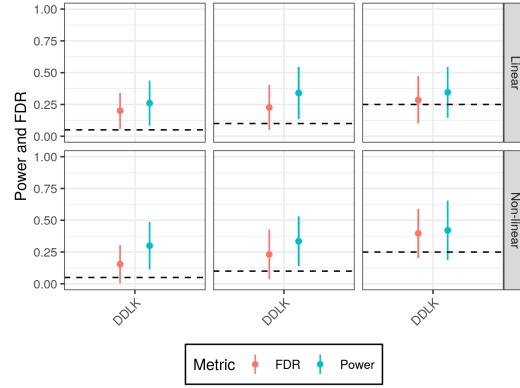

Figure 6: FDR control and power of DDLK on the mixture-of-Gaussians dataset using the ground truth feature density in training (compare to Figure 2).

## 620 J Observed Power and FDR control for given number of MCMC samples

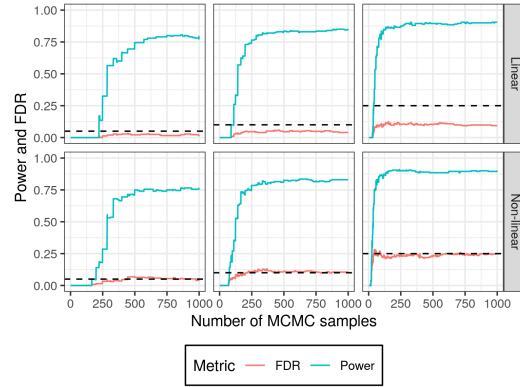

Figure 7: Power and FDR control of FLOWSELECT on the scRNA-seq dataset as a function of the number of MCMC samples at targeted FDRs of 0.05, 0.1, and 0.25 (indicated by the dashed lines). This suggests that the consequence of terminating the MCMC chain prematurely leads to a drop in power but FDR control is still maintained.

## 621 K Mixture-of-Gaussians results for FDR and Power under Sudarshan et al. 622 (2020) settings

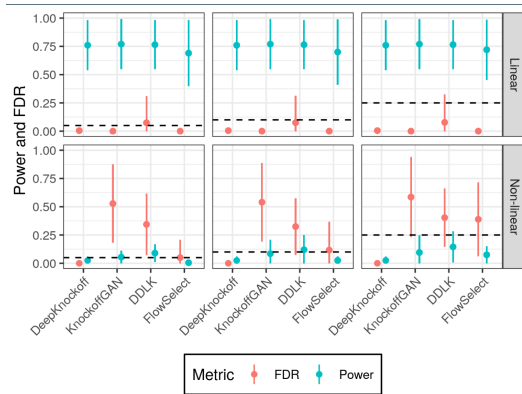

Figure 8: Mixture-of-gaussians setup with  $\rho = (0.6, 0.4, 0.2)$  and  $N = 2000$  to match the settings in Sudarshan et al. (2020). In the linear response setting, which matches the data-generating process of Sudarshan et al. (2020), all competing knockoff-based methods (i.e., DDLK, KnockoffGAN, and DeepKnockoff) as well as FlowSelect control the FDR at 5%, 10% and 25% levels and achieve a power of about 0.75. In the non-linear response setting, none of the methods control FDR, except for DeepKnockoffs which had nearly zero power. The good performance in the linear setting can be explained by the LASSO feature statistic shrinking most null features to zero since they have relatively low correlation. Since FDR control should hold for any response setting, these findings suggest that none of the methods do well in modeling the underlying distribution with  $N = 2000$  observations.

623 **L** Learned normalizing flow mapping on mixture-of-Gaussians and  
624 scRNA-seq datasets

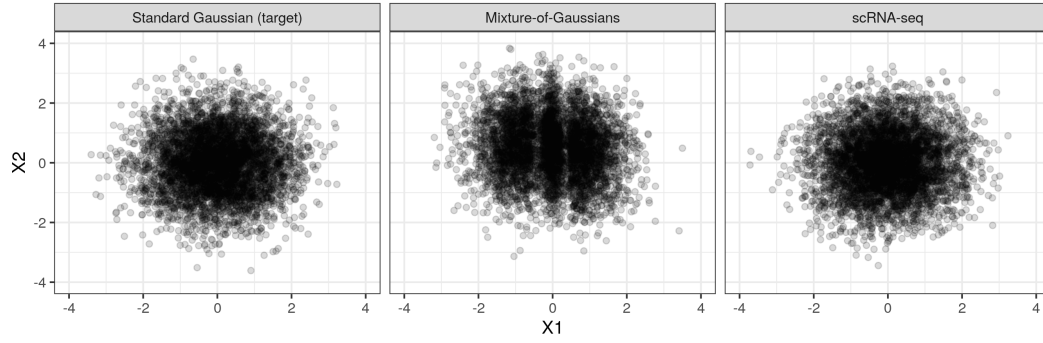

Figure 9: Plot of features mapped to flow space by the learned normalizing flow within FLOWSELECT with  $j = 1$  on the x-axis and  $j = 2$  on the y-axis. Mapped features are shown for the mixture-of-Gaussians and scRNA-seq datasets, and they are compared to samples from a true standard Gaussian distribution.
